# Supplementary material for: An X-state solid–liquid mixture with unusual mechanical properties formed by water and coordination polymer nanosheet nanoarchitectonics
Source: Royal Society of Chemistry journal article supplement (doi:10.1039/d1nr08114d), 2022-01-01
Supplement: d1nr08114d1.pdf [file d1nr08114d1.pdf]

Electronic Supplementary Material (ESI) for Nanoscale.  
This journal is © The Royal Society of Chemistry 2021

## **An X-State Solid-liquid Mixture with Unusual Mechanical Properties by Water and Coordination Polymer Nanosheets Nanoarchitectonics**

*Chunjing Shi,<sup>a, b</sup> Qi Dang,<sup>a</sup> Wei Zhang,<sup>a</sup> Jiwei Cui,<sup>\*, c</sup> Jian Liu,<sup>\*, b</sup> Ming Hu<sup>\*, a</sup>*

<sup>a</sup>Engineering Research Center for Nanophotonics and Advanced Instrument (MOE),  
School of Physics and Electronic Science, East China Normal University, Shanghai  
200241, China

<sup>b</sup>State Key Laboratory of Catalysis, Dalian Institute of Chemical Physics, Chinese  
Academy of Sciences, and Dalian National Laboratory for Clean Energy, 457  
Zhongshan Road, Dalian 116023, P. R. China

<sup>c</sup> Key Laboratory of Colloid and Interface Chemistry of the Ministry of Education,  
School of Chemistry and Chemical Engineering, Shandong University, Jinan,  
Shandong 250100, China

**Table S1.** Illustration of mechanical characteristics of liquid-solid mixtures. The content of the liquid phase in the mixture decreases from the top rows to the bottom rows.

|                                    |         | Deformation characteristic               | Elastic modulus | Type        |
|------------------------------------|---------|------------------------------------------|-----------------|-------------|
| Content of continuous liquid phase | Sol     | Fluidic ( <i>i.e.</i> , shear thining)   | N/A             | Liquid-like |
|                                    | Slurry  | Fluidic ( <i>i.e.</i> , shear thining)   | N/A             | Liquid-like |
|                                    | Dough   | Fluidic ( <i>i.e.</i> , Bingham plastic) | N/A or very low | Liquid-like |
|                                    | X-state | ?                                        | ?               | ?           |
|                                    | Solid   | Elastic                                  | High            | Solid-like  |

**Fig. S1**

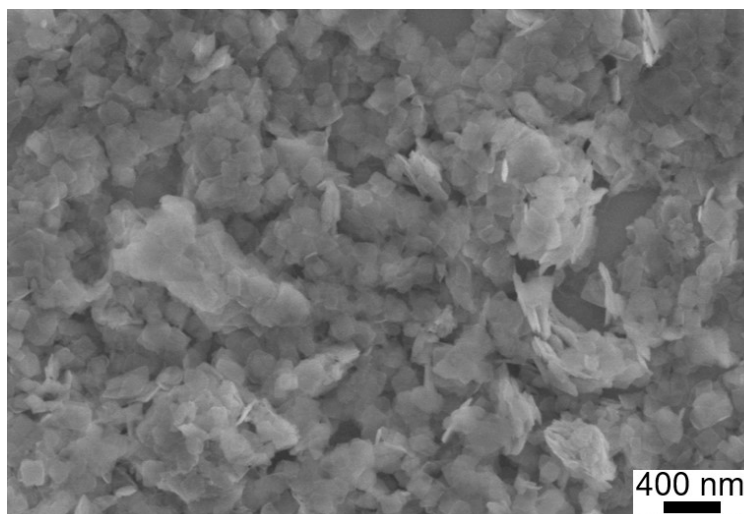

Fig. S1 SEM image of the Ni(H<sub>2</sub>O)<sub>2</sub>[(Ni(CN)<sub>4</sub>]·H<sub>2</sub>O nanosheets.

Fig. S2

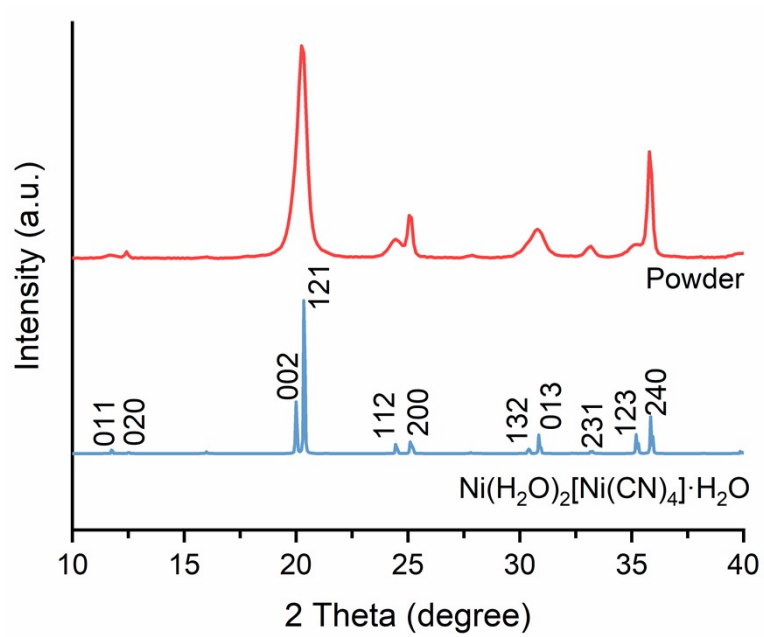

Fig. S2 Powder XRD profile of the  $\text{Ni}(\text{H}_2\text{O})_2[(\text{Ni}(\text{CN})_4)] \cdot \text{H}_2\text{O}$  nanosheets.

Fig. S3

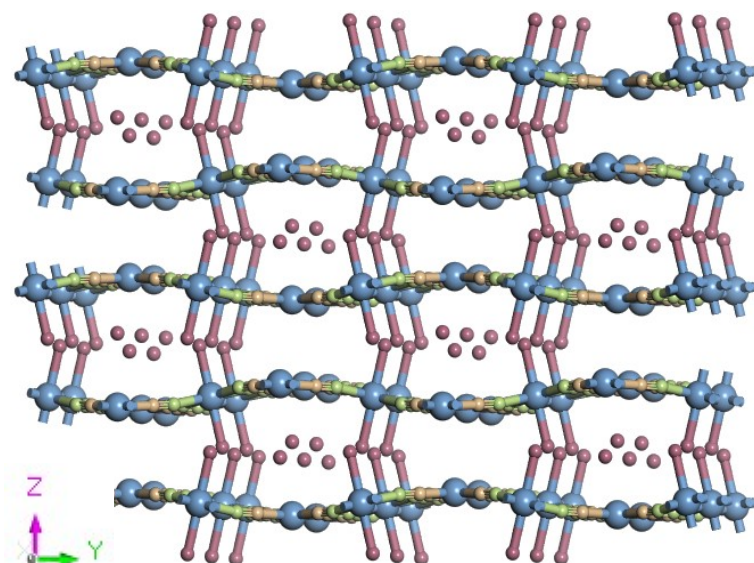

Fig. S3 Illustration for  $L_1$  phase. Coordinated water molecules from different layers remain linked through aquo bridges. Along the x axis, the layers are stacked according to out-of-phase waves in order to minimize the interlayer region free space.

**Fig. S4**

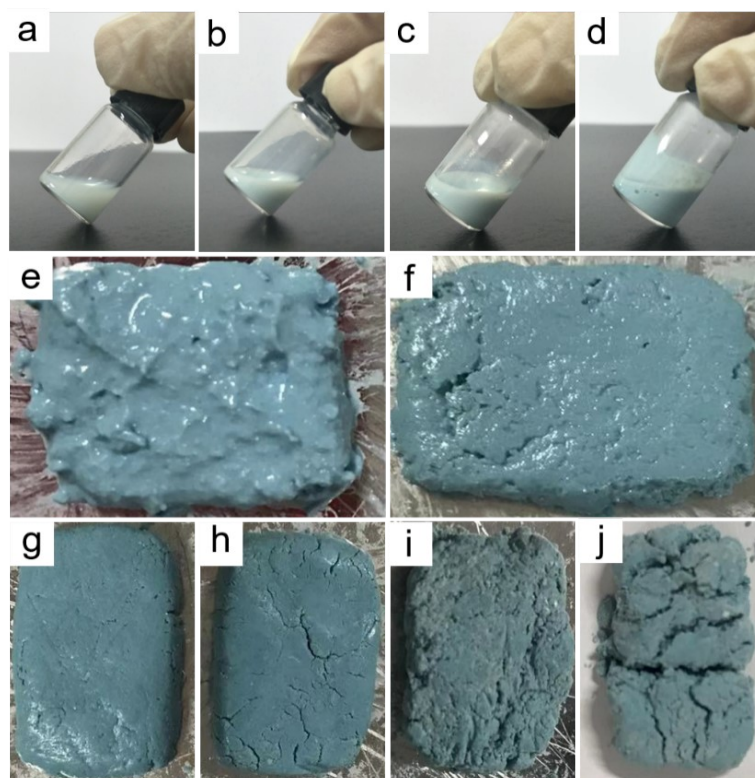

**Fig. S4** Photos of the nanosheets/water mixtures with varied concentration of the solids. (a) 20 mg/mL (liquid). (b) 50 mg/mL (liquid). (c) 200 mg/mL (liquid). (d) 500 mg/mL (liquid). (e) 800 mg/mL (slurry). (f) 1000 mg/mL (slurry). (g) 1200 mg/mL (dough). (h) 1500 mg/mL (dough). (i) 1800 mg/mL (dough). (j) 2000 mg/mL (dough).

Fig. S5

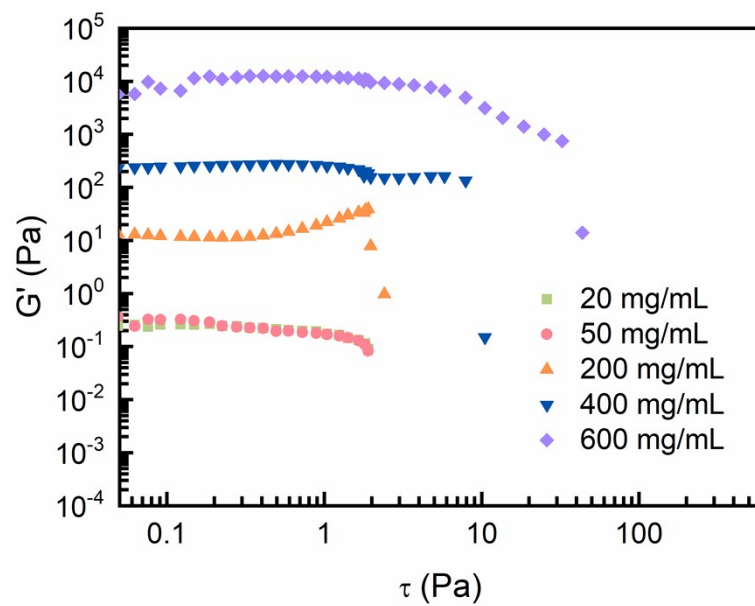

Fig. S5 Rheological diagram of the water/nanosheets mixtures with varied concentration of the solids. (from liquid to slurry states).

**Fig. S6**

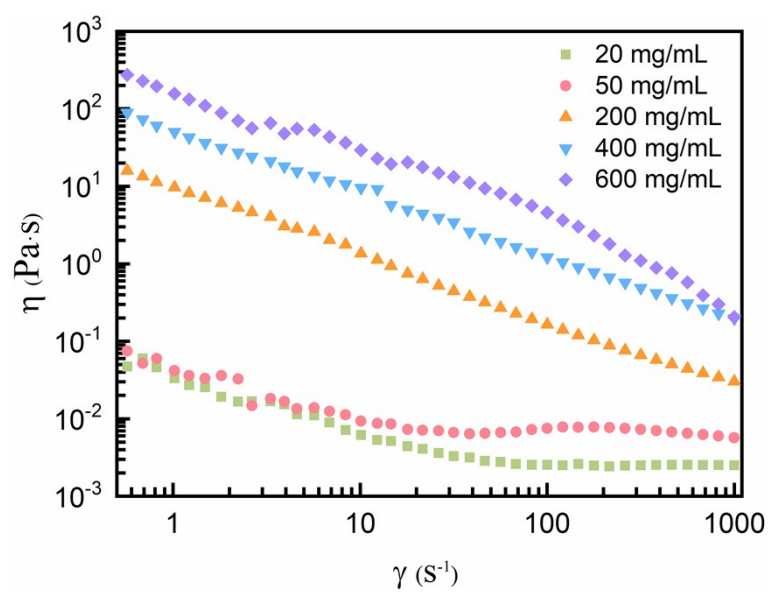

Fig. S6 Viscosity versus shear strain rate curves of the water/nanosheets mixtures with varied concentration of the solids (from liquid to slurry states).



**Fig. S7**

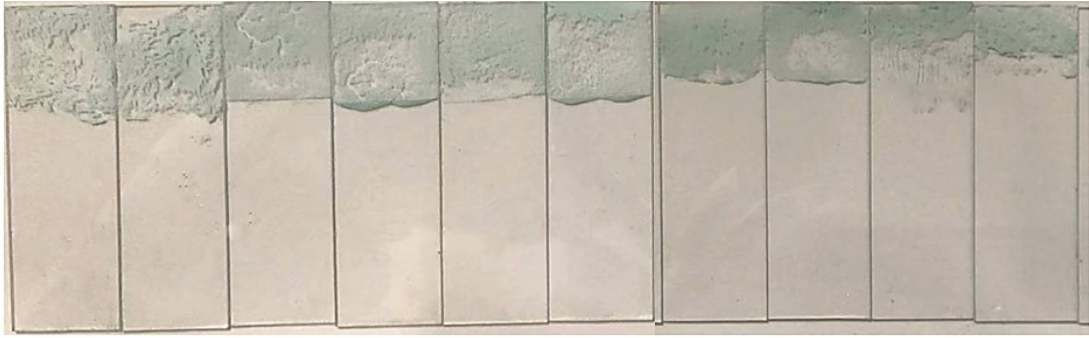

Fig. S7 Photograph of the glass sides after shear tensile tests.

Fig. S8

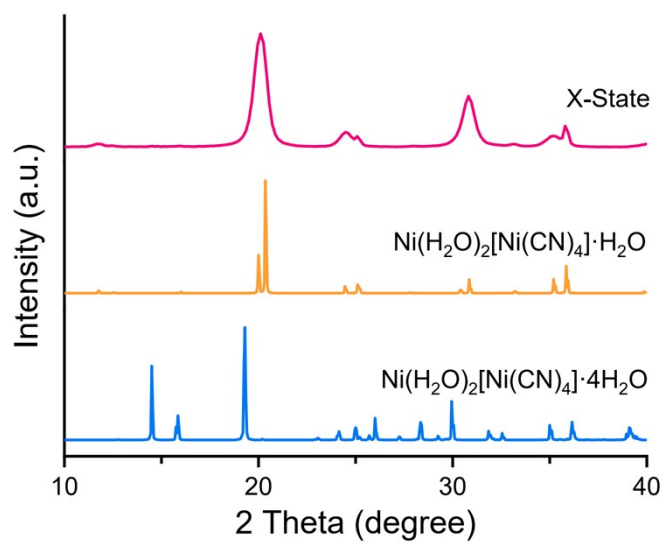

Fig. S8 XRD profile of the X-state sample.

**Fig. S9**

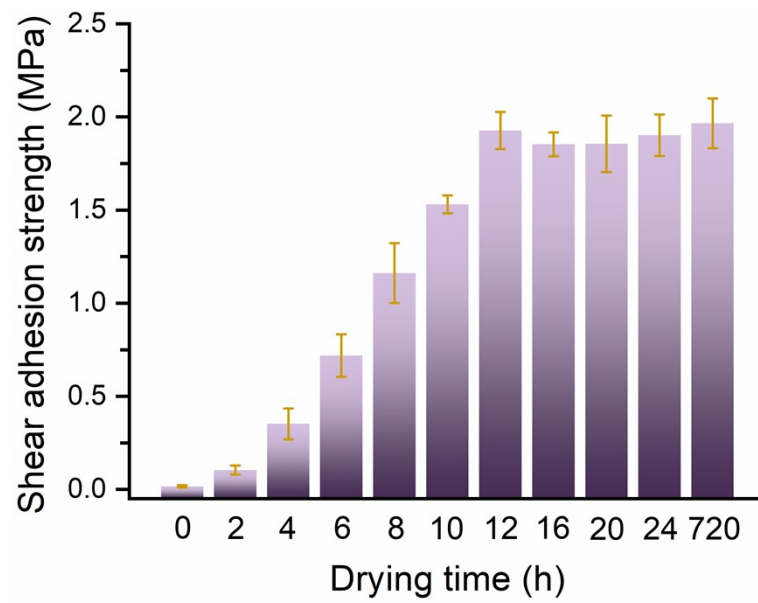

Fig. S9 Time course shear adhesion strength change during natural drying of the dough sample. The initial samples are dough state samples. The evaporation condition is at ambient condition (25 °C, 40% RH) in a constant chamber.

**Fig. S10**

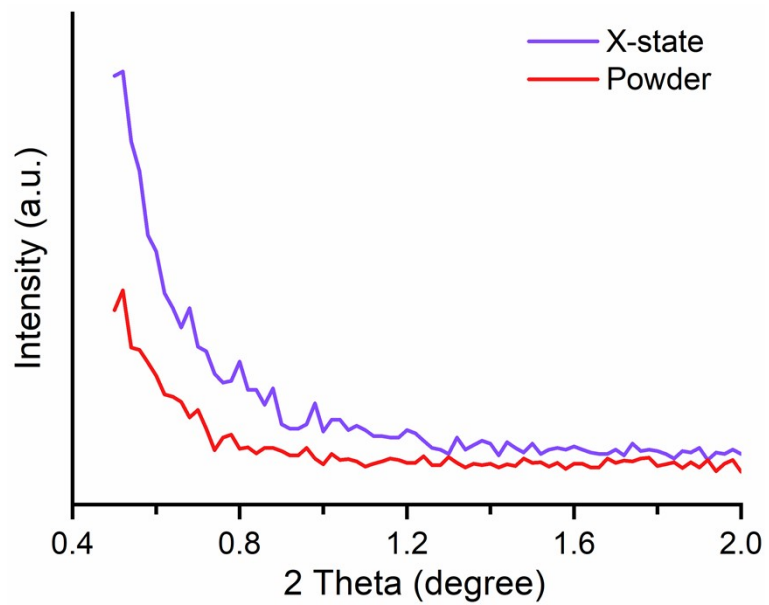

Fig. S10 Small-angle X-ray diffraction profiles of the X-state and powder samples.

**Fig. S11**

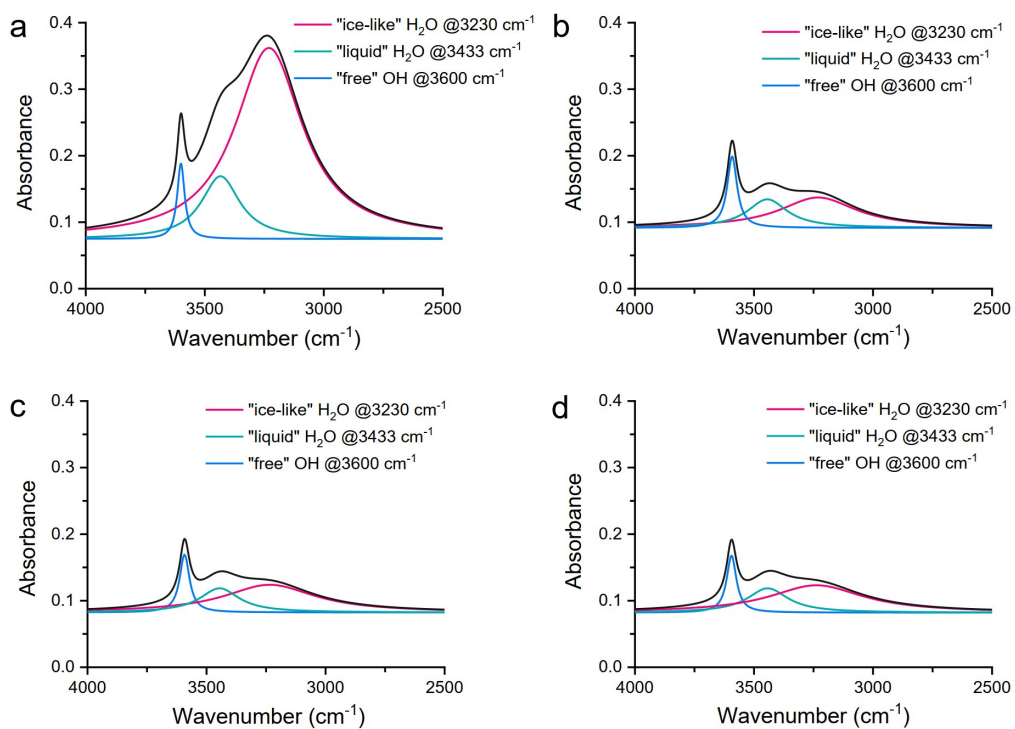

Fig. S11 IR spectra of the samples during the evaporation process (from the dough-state to X-state). (a) 0 h. (b) 4 h. (c) 8 h. (d) 12 h.

**Fig. S12**

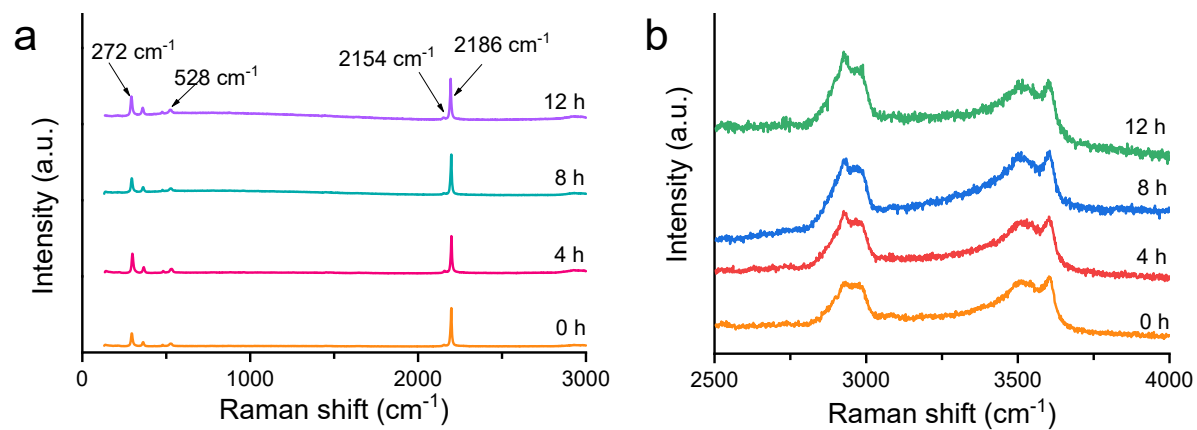

Fig. S12 Raman spectra of the samples during the evaporation process (from the dough-state to X-state). (a) 0~3000  $\text{cm}^{-1}$ . (b) 2500~4000  $\text{cm}^{-1}$ .

**Fig. S13**

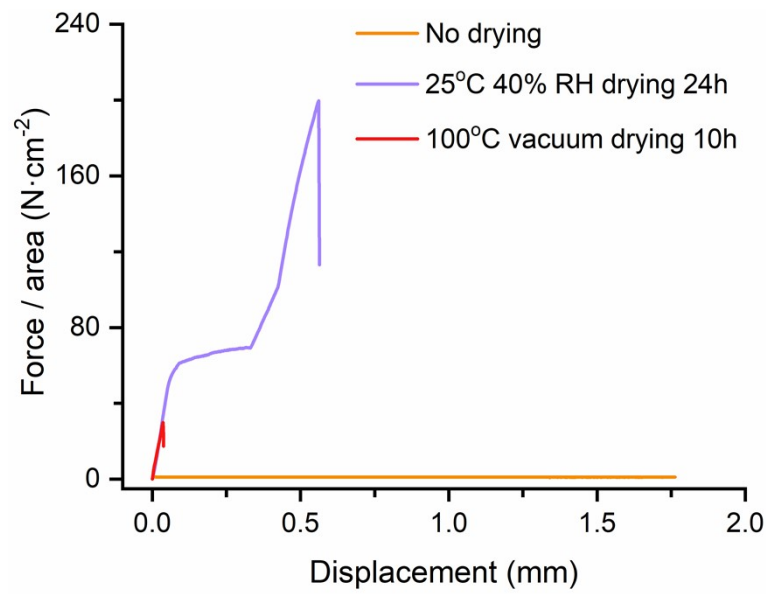

Fig. S13 Comparison of the force–displacement curves of dough state sample, and the other samples dried under different conditions.

**Fig. S14**

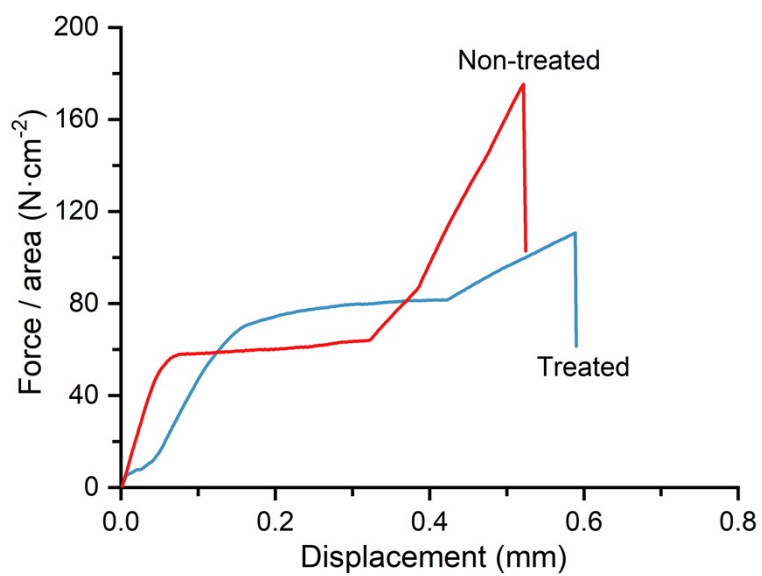

Fig. S14 Force–displacement curves of the X-state sample sandwiched between Si plates with and without HF treatment.



**Fig. S15**

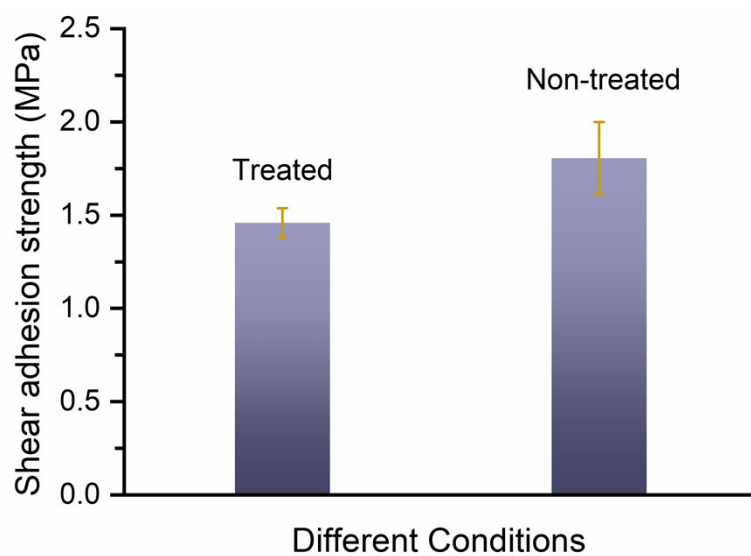

Fig. S15 Shear adhesion strength of the X-state samples sandwiched between Si plates with and without HF treatment.

**Fig. S16**

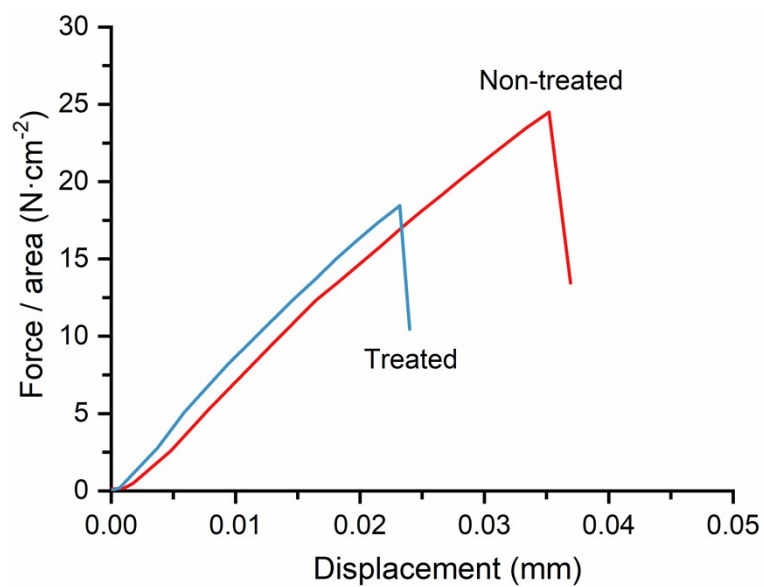

Fig. S16 Force–displacement curves of the samples sandwiched between Si plates with and without HF treatment. The samples are dried from the X-state.

**Fig. S17**

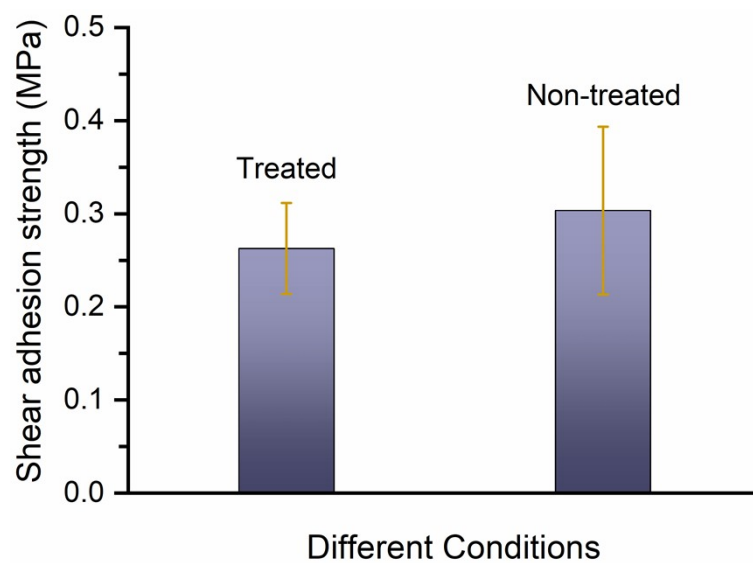

Fig. S17 Adhesion strength measured for solid using substrate with treatment and without HF treatment. The samples are dried from the X-state.

**Fig. S18**

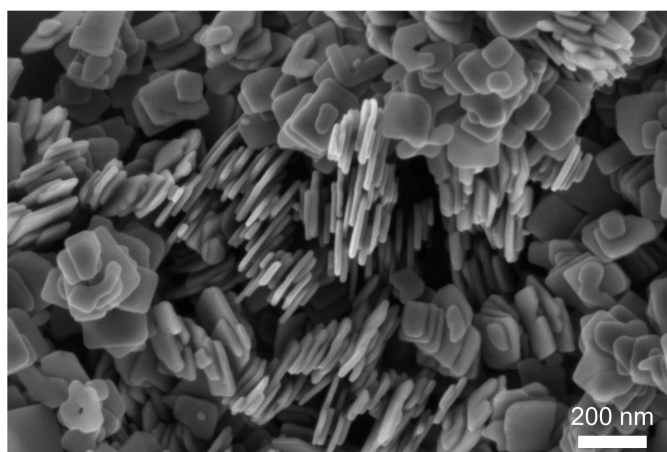

Fig. S18 SEM image of the TiO<sub>2</sub> nanosheets.

**Fig. S19**

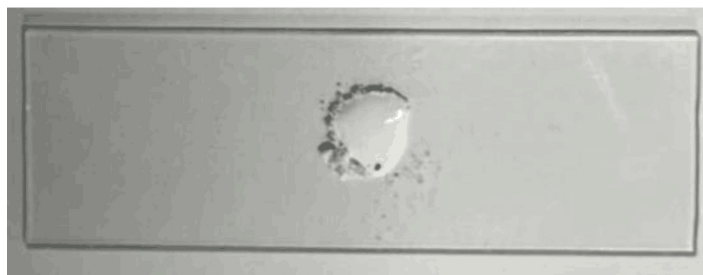

Fig. S19 Photo of the wet TiO<sub>2</sub> nanosheets.

**Fig. S20**

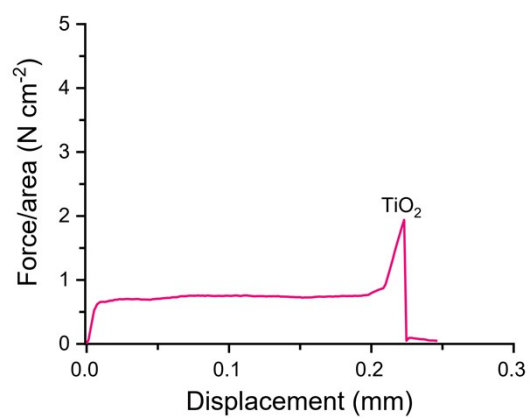

Fig. S20 Shear force vs displacement curve of the TiO<sub>2</sub> sample.

**Fig. S21**

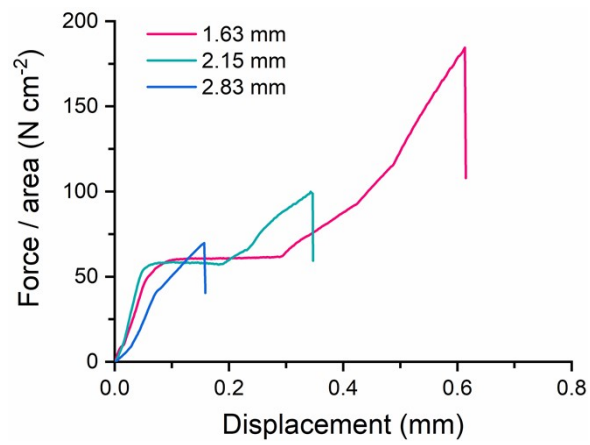

Fig. S21 Shear force vs displacement curves of the X-state samples with different thicknesses.

**Fig. S22**

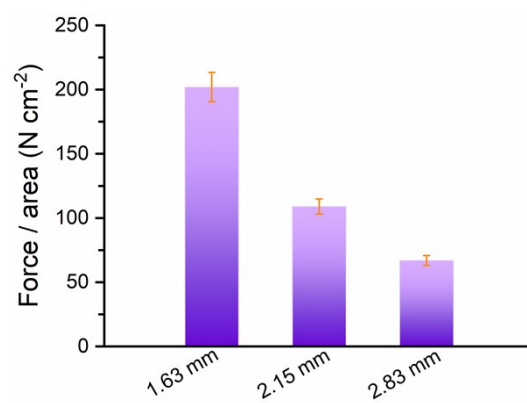

Fig. S22 Shear adhesion strength of the X-state samples with different thicknesses.
